# Supplementary material
Source: publisher figshare collection journal article supplement (https://rs.figshare.com/ndownloader/files/15378935)
Supplement: Supplementary file [file 15378935]

Electronic Supplementary Information

**Ants learn fast and do not forget: olfactory associative learning, memory and extinction in *Formica fusca***

Baptiste Piqueret, Jean-Christophe Sandoz, Patrizia d’Ettorre

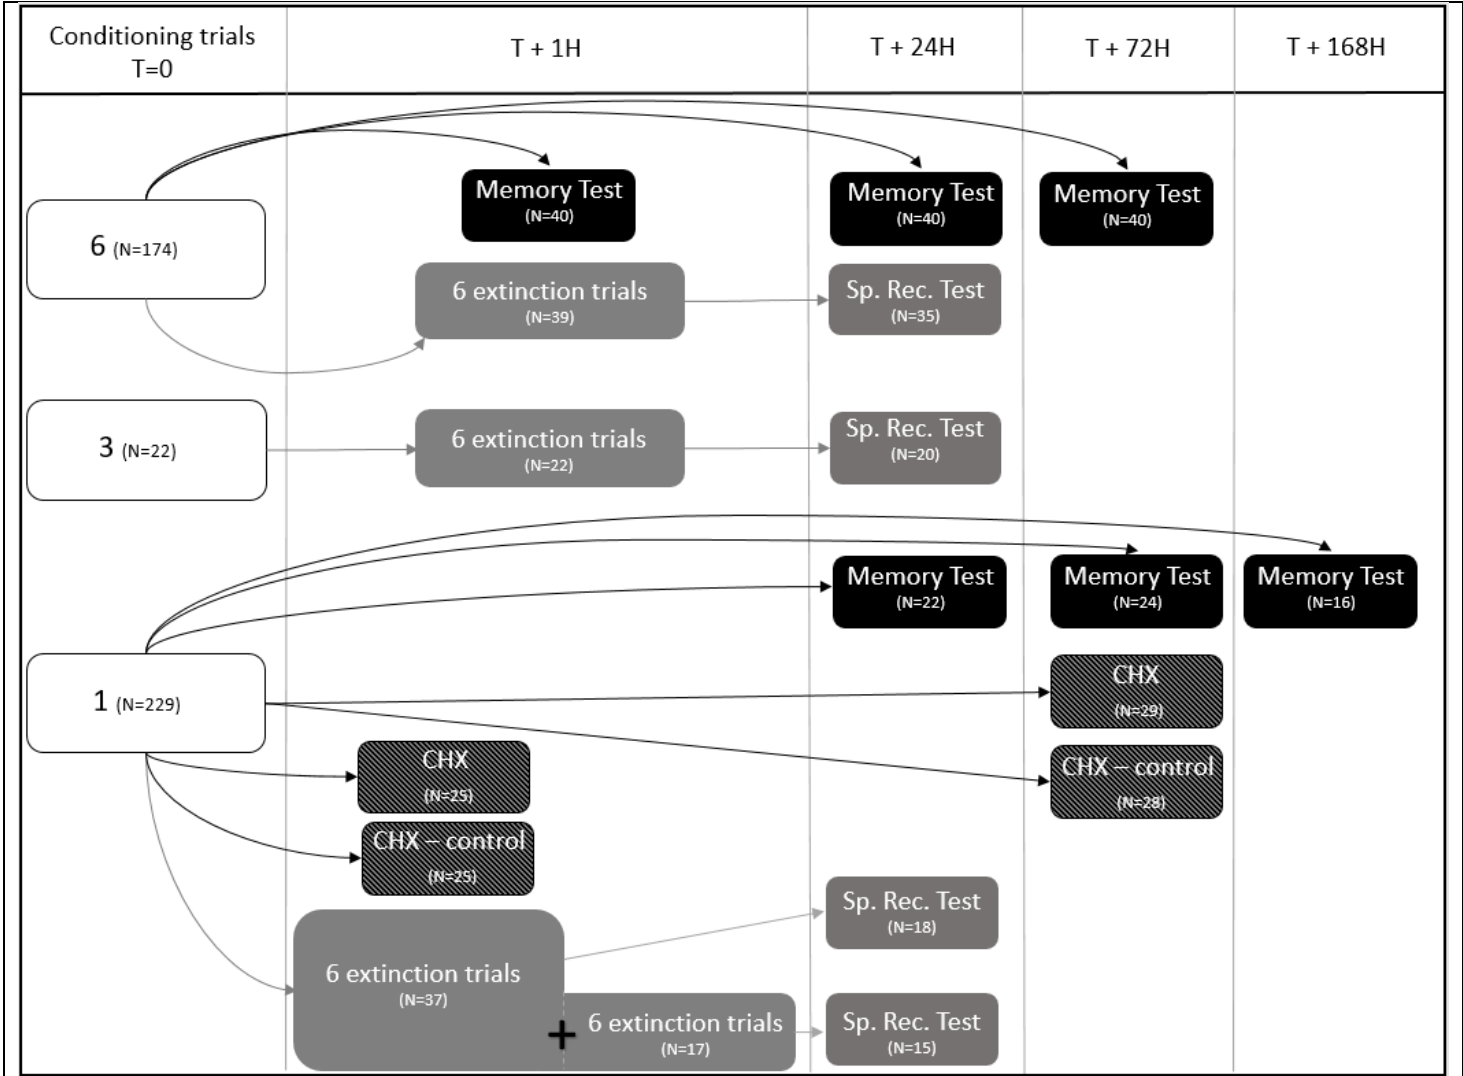

**Figure S1:** Overview of the conducted experiments. The left column shows the number of conditioning trials ants were subjected to (white box). Three different experiments were performed. Independent groups of ants underwent a memory test (black boxes), an extinction protocol (grey boxes) or were treated with CHX before performing a memory test (black striped boxes). Tests were conducted 1 h, 24 h, 72 h or 168 h after the end of conditioning. For the ants that underwent an extinction protocol, a test of spontaneous recovery (Grey boxes: Sp. Rec. Test) was performed 24h after the last extinction trial. N= number of ants.

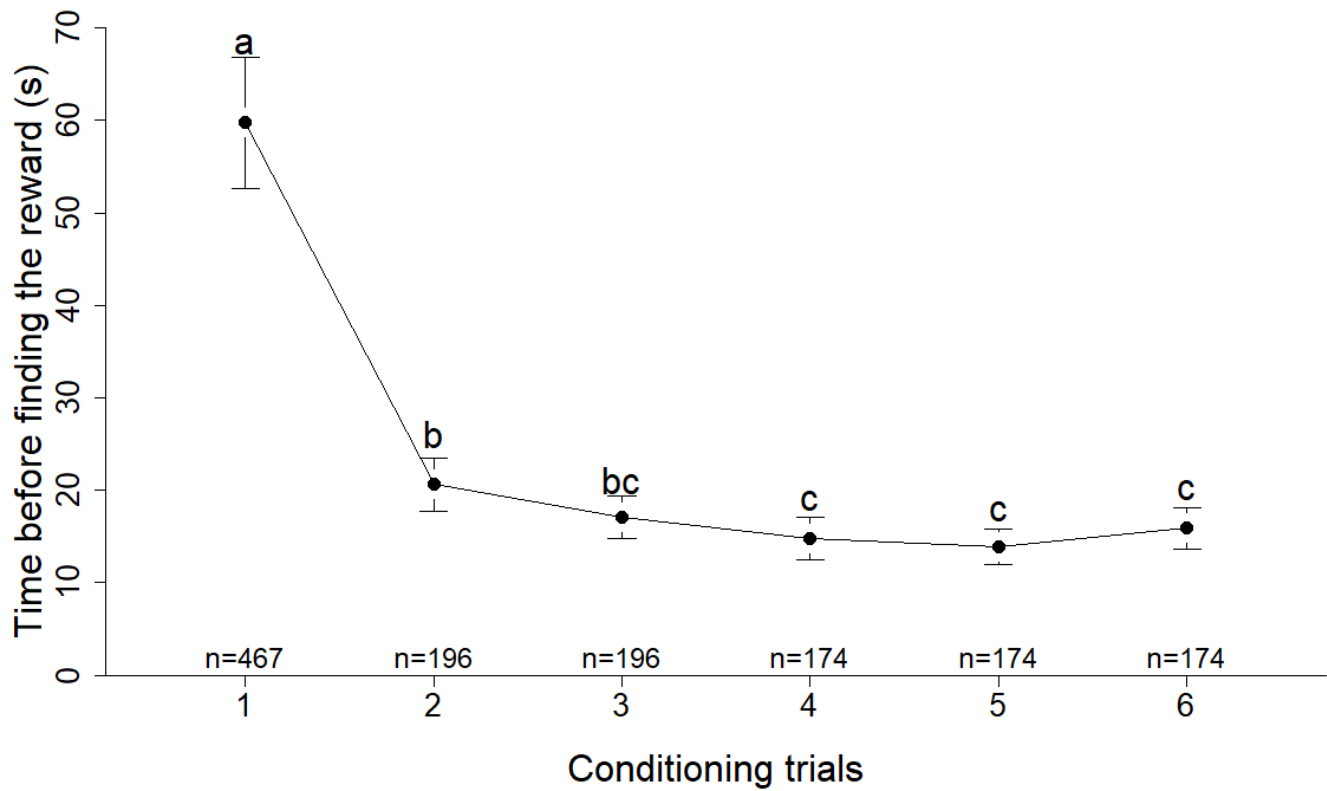

**Figure S2:** Time (mean + 95% confidence interval) spent by the ants to find the reward along the conditioning trials (N = 174 for six trials, N = 22 for three trials, N = 271 for one trial). Letters indicate difference between trials after Holm-Bonferroni correction. In particular, the first trial was different from all the other trials, in which the time to find the reward was significantly shorter (post-hoc,  $p < 0.001$  for all comparison, after Holm-Bonferroni correction). The second and third trials were not significantly different ( $p > 0.05$ ); however, the second trial was different from all the other trials ( $p < 0.05$  in all cases). There was no difference from the third trial to the sixth ( $p > 0.05$  in all cases).

**Table S1|** Result of the different model used during the analyses of the ant conditioning (Fig S3): Time was always the dependent variable. Significant effects are given in bold.

| Focus on the factor(s)                                     | Df | F value | p value          |
|------------------------------------------------------------|----|---------|------------------|
| <b>Conditioning odorant × trials × Conditioning groups</b> | 2  | 0.9271  | 0.396            |
| <b>Conditioning odorant × trials</b>                       | 5  | 0.9101  | 0.473            |
| <b>Trials</b>                                              | 5  | 72.4502 | <b>&lt;0.001</b> |
| Trials (1 vs 2)                                            |    |         | <b>&lt;0.001</b> |
| Trials (1 vs 3)                                            |    |         | <b>&lt;0.001</b> |
| Trials (1 vs 4)                                            |    |         | <b>&lt;0.001</b> |
| Trials (1 vs 5)                                            |    |         | <b>&lt;0.001</b> |
| Trials (1 vs 6)                                            |    |         | <b>&lt;0.001</b> |
| Trials (2 vs 3)                                            |    |         | 0.287            |
| Trials (2 vs 4)                                            |    |         | <b>0.007</b>     |
| Trials (2 vs 5)                                            |    |         | <b>&lt;0.001</b> |
| Trials (2 vs 6)                                            |    |         | <b>0.048</b>     |
| Trials (3 vs 4)                                            |    |         | 0.685            |
| Trials (3 vs 5)                                            |    |         | 0.270            |
| Trials (3 vs 6)                                            |    |         | 1.000            |
| Trials (4 vs 5)                                            |    |         | 1.000            |
| Trials (4 vs 6)                                            |    |         | 1.000            |
| Trials (5 vs 6)                                            |    |         | 0.680            |

**Table S2** | Results of the model used during the analyses of the memory tests (Fig 3): Time was the dependent variable; *p*-value are adjusted with Bonferroni-Holm correction when needed. Significant effects are given in bold. Tendency effects are underlined.

| Interaction or factor analysed                | Post-hoc | Df | F value | p value          |
|-----------------------------------------------|----------|----|---------|------------------|
| elapsed time × conditioning groups × stimulus |          | 4  | 1.7707  | 0.133            |
| conditioning groups × stimulus                |          | 1  | 0.5172  | 0.472            |
| stimulus × elapsed time                       |          | 3  | 7.8924  | <b>&lt;0.001</b> |
| stimulus × elapsed time                       | 1h/24h   | 1  |         | 0.716            |
| stimulus × elapsed time                       | 1h/72h   | 1  |         | <b>0.022</b>     |
| stimulus × elapsed time                       | 1h/168h  | 1  |         | <b>&lt;0.001</b> |
| stimulus × elapsed time                       | 24h/72   | 1  |         | <b>0.012</b>     |
| stimulus × elapsed time                       | 24h/168h | 1  |         | <b>&lt;0.001</b> |
| stimulus × elapsed time                       | 72h/168h | 1  |         | <u>0.068</u>     |
| Stimulus                                      | 1h       | 1  | 62.997  | <b>&lt;0.001</b> |
| Stimulus                                      | 24h      | 1  | 65.597  | <b>&lt;0.001</b> |
| Stimulus                                      | 72h      | 1  | 13.141  | <b>&lt;0.001</b> |
| Stimulus                                      | 168h     | 1  | 0.488   | 0.495            |

**Table S3** | Results of the model used during the analyses of the effect of the cycloheximide (CHX, given 3 hours before the conditioning trial) on memory retention (Fig 4): Time was the dependent variable. Significant effects are given in bold. Tendency effects are underlined.

| Interaction or factor analysed | Post-hoc | Was CHX given? | Df | F value | p value      |
|--------------------------------|----------|----------------|----|---------|--------------|
| Treatment × Stimulus           |          |                |    | 0.783   | 0.378        |
| Stimulus                       | 1h       | No             | 1  | 4.167   | <b>0.046</b> |
| Stimulus                       | 1h       | Yes            | 1  | 8.627   | <b>0.005</b> |
| Treatment × Stimulus           |          |                |    | 2.907   | <u>0.091</u> |
| Stimulus                       | 72h      | No             | 1  | 6.039   | <b>0.017</b> |
| Stimulus                       | 72h      | Yes            | 1  | 0.025   | 0.872        |

**Table S4** | Results of the model used during the analyses of the effect of the cycloheximide (CHX, given 72 hours before the conditioning trial) on memory retention: Time was the dependent variable. Significant effects are given in bold.

| Interaction or factor analysed | Post-hoc | Df | F value | p value          |
|--------------------------------|----------|----|---------|------------------|
| Treatment × Stimulus           |          | 1  | 2.204   | 0.143            |
| Stimulus                       | CHX      | 1  | 24.468  | <b>&lt;0.001</b> |
| Stimulus                       | Control  | 1  | 12.590  | <b>0.001</b>     |

**Table S5** | Results of the model used during the analyses of the extinction procedure (Fig 5): Time was the dependent variable. Significant effects are given in bold. Tendency effects are underlined.

| Interaction or factor analysed          | Post-hoc              | Df | F value | p value          |
|-----------------------------------------|-----------------------|----|---------|------------------|
| stimulus x conditioning group           |                       | 2  | 35.621  | <b>&lt;0.001</b> |
| <b><u>Six conditioning trials</u></b>   |                       |    |         |                  |
| stimulus x extinction trials            |                       | 5  | 1.397   | 0.224            |
| Stimulus                                | Trial 1               | 1  | 106.180 | <b>&lt;0.001</b> |
| Stimulus                                | Trial 2               | 1  | 127.940 | <b>&lt;0.001</b> |
| Stimulus                                | Trial 3               | 1  | 102.750 | <b>&lt;0.001</b> |
| Stimulus                                | Trial 4               | 1  | 142.700 | <b>&lt;0.001</b> |
| Stimulus                                | Trial 5               | 1  | 74.979  | <b>&lt;0.001</b> |
| Stimulus                                | Trial 6               | 1  | 50.542  | <b>&lt;0.001</b> |
| Stimulus                                | Trial Recuperation    | 1  | 66.753  | <b>&lt;0.001</b> |
| stimulus x extinction trials            | Trial 6/ Recuperation | 1  | 0.104   | 0.746            |
| <b><u>Three conditioning trials</u></b> |                       |    |         |                  |
| stimulus x extinction trials            |                       | 5  | 2.140   | <u>0.061</u>     |
| Stimulus                                | Trial 1               | 1  | 29.489  | <b>&lt;0.001</b> |
| Stimulus                                | Trial 2               | 1  | 71.702  | <b>&lt;0.001</b> |
| Stimulus                                | Trial 3               | 1  | 15.145  | <b>&lt;0.001</b> |
| Stimulus                                | Trial 4               | 1  | 35.551  | <b>&lt;0.001</b> |
| Stimulus                                | Trial 5               | 1  | 28.973  | <b>&lt;0.001</b> |
| Stimulus                                | Trial 6               | 1  | 49.574  | <b>&lt;0.001</b> |
| Stimulus                                | Trial Recovery        | 1  | 19.645  | <b>&lt;0.001</b> |
| stimulus x extinction trials            | Trial 6/Recovery      | 1  | 0.008   | 0.926            |
| <b><u>One conditioning trial</u></b>    |                       |    |         |                  |
| Stimulus x extinction trials            |                       | 11 | 1.825   | <b>0.046</b>     |
| Stimulus                                | Trial 1               | 1  | 16.689  | <b>&lt;0.001</b> |
| Stimulus                                | Trial 2               | 1  | 23.354  | <b>&lt;0.001</b> |
| Stimulus                                | Trial 3               | 1  | 28.386  | <b>&lt;0.001</b> |
| Stimulus                                | Trial 4               | 1  | 27.947  | <b>&lt;0.001</b> |
| Stimulus                                | Trial 5               | 1  | 12.617  | <b>&lt;0.001</b> |
| Stimulus                                | Trial 6               | 1  | 22.053  | <b>&lt;0.001</b> |
| Stimulus                                | Trial 7               | 1  | 3.687   | <u>0.063</u>     |
| Stimulus                                | Trial 8               | 1  | 8.742   | <b>0.005</b>     |
| Stimulus                                | Trial 9               | 1  | 0.883   | 0.354            |
| Stimulus                                | Trial 10              | 1  | 0.001   | 0.975            |
| Stimulus                                | Trial 11              | 1  | 0.874   | 0.356            |
| Stimulus                                | Trial 12              | 1  | 4.139   | <u>0.051</u>     |
| Stimulus                                | Trial Recovery 6      | 1  | 22.597  | <b>&lt;0.001</b> |
| Stimulus                                | Trial Recovery 12     | 1  | 0.262   | 0.612            |
| Stimulus x extinction trials            | Trial 6/ Recovery 6   | 1  | 0.177   | 0.675            |
| Stimulus x extinction trials            | Trial 12/ Recovery 12 | 1  | 0.749   | 0.390            |
